# Supplementary material
Source: publisher figshare collection journal article supplement (https://acs.figshare.com/ndownloader/files/4314670)
Supplement: Supplementary file 1 [file 4314670]

## Supplementary Information

### Solution-Controlled Self-assembly of ZnO Nanorods into Hollow Microspheres

*Peng Hu, Xing Zhang, Ning han, Weicheng Xiang, Yuebin Cao and Fangli Yuan\**

State Key Laboratory of Multi-phase Complex Systems, Institute of Process Engineering, Chinese  
Academy of Sciences, Beijing 100190 (PR China)

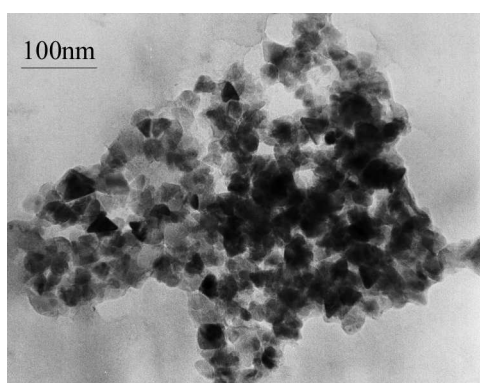

Figure S1 TEM image of products synthesized in glycerol solution

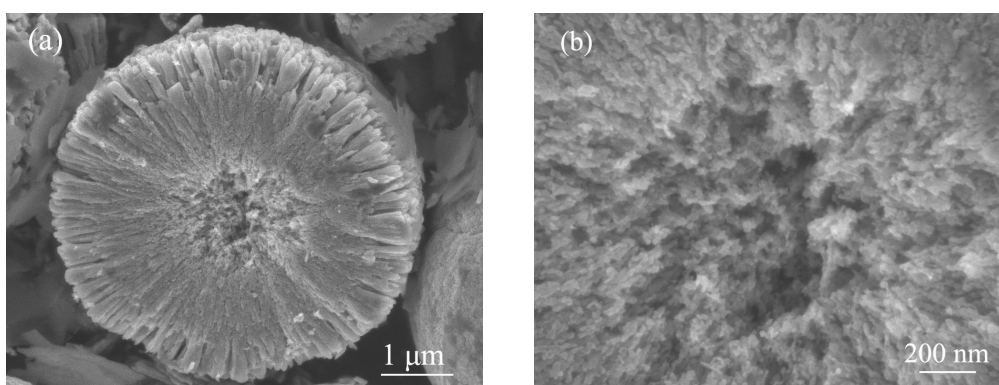

Figure S2 the structure evolution of the sphere from nanoparticles to nanorods: (a) low magnification and (b) high magnified SEM images of a defined sphere
